# Supplementary material
Source: PubMed Central journal article supplement (PMC4517262)
Supplement: pnas.201419225SI.pdf [file pnas.201419225SI.pdf]

# Supporting Information

Kanhayuwa et al. 10.1073/pnas.1419225112

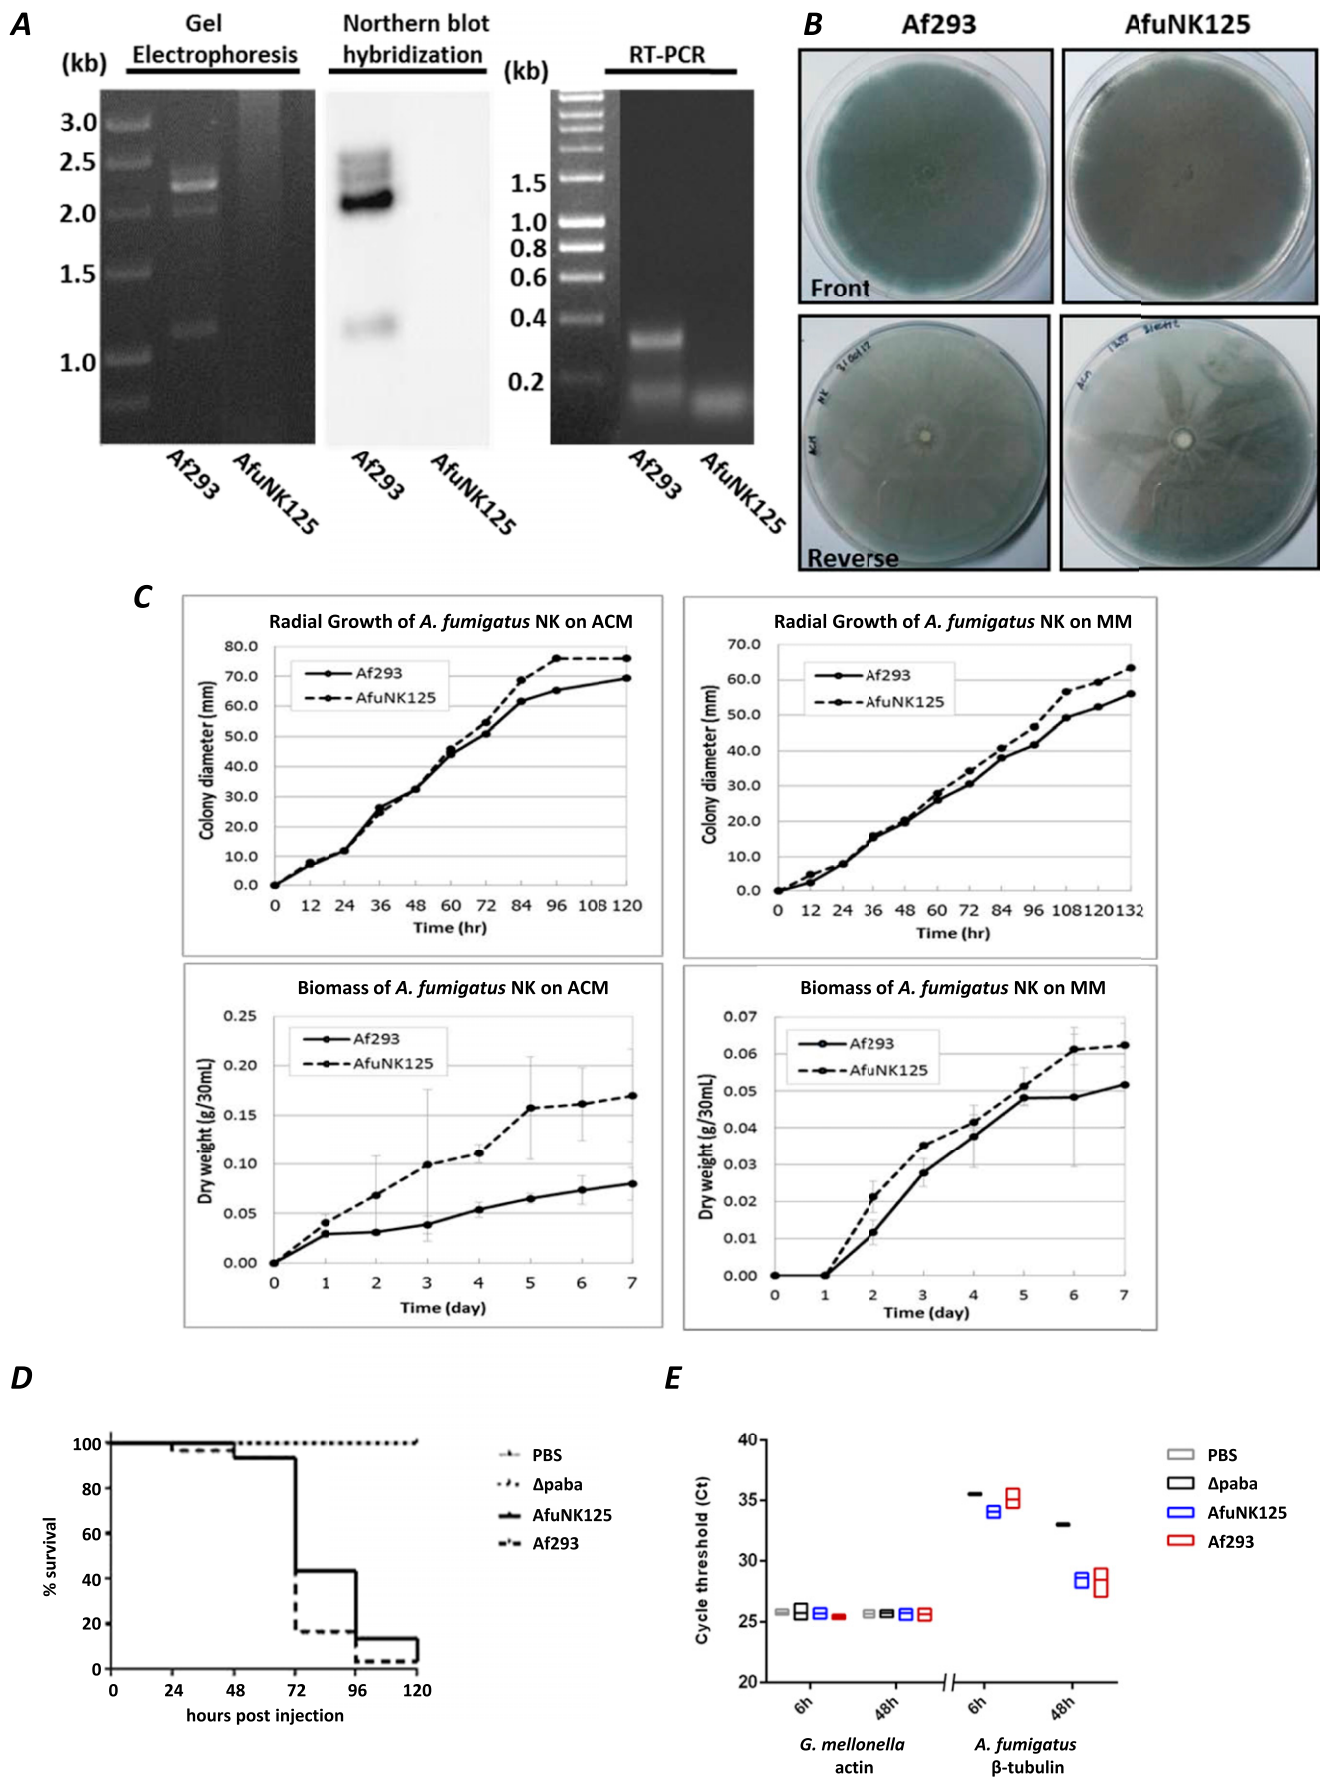

**Fig. S1.** (A) Agarose gel electrophoresis, Northern blot hybridization, and attempted RT-PCR amplification of a AfuTmV-1 dsRNA 2 337-bp fragment from the AfuTmV-1-infected *A. fumigatus* Af293 isolate and cycloheximide-treated and virus-free, isogenic isolate *A. fumigatus* AfuNK125 plus analysis of pathogenicity of both strains. Hyperladder 1 (Bioline) was used as marker. (B) Colonies of the Af293 and AfuNK125 grown on ACM at 37 °C for 6 d. (C) Comparison of the fungal growth under different cultivation conditions. Radial growth of Af293 and AfuNK125 on ACM plates (Top Left) and on MM plates (Top Right); biomass production of Af293 and AfuNK125 in ACM broth (Bottom Left) and in MM broth (Bottom Right). (D) Mean survival curves of *G. mellonella* larvae infected with Af293 and AfuNK125 ( $1 \times 10^5$  spores per larva). The *A. fumigatus*  $\Delta$ paba strain was included as an avirulent control. (E) Fungal burden in *G. mellonella* larvae infected with Af293 and AfuNK125, as shown by quantitative PCR. Cycle of threshold (Ct) values indicate the PCR cycle where the amplified product was first detectable.

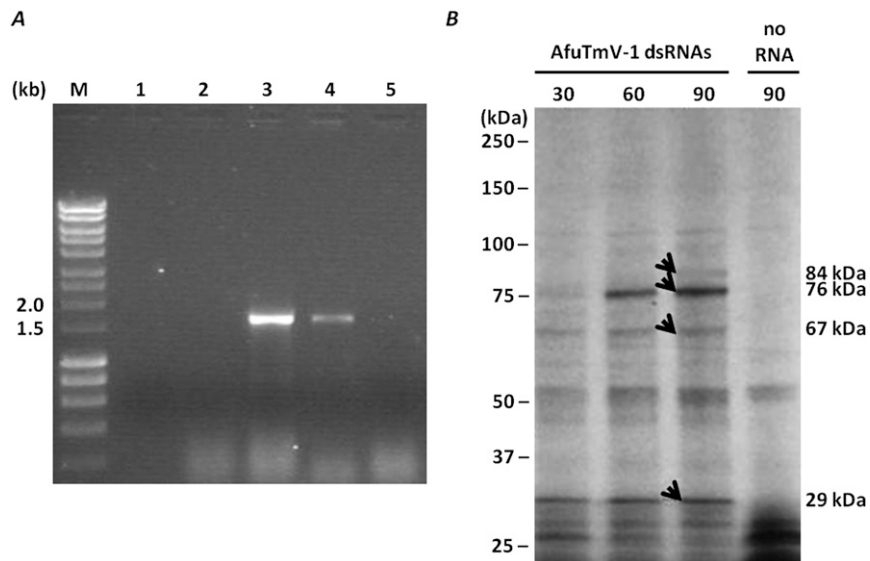

**Fig. 52.** (A) Transfection of *A. fumigatus* protoplasts with AfuPV-1 virions and AfuPV-1 dsRNA. Total RNA extracts were used for RT-PCR amplification using oligonucleotide primers designed to produce an amplicon corresponding to the complete AfuPV-1 dsRNA 1 RdRP gene 1,626 bp in size. Lane M, Hyperladder 1 marker DNAs (Bioline); RNA extracts of the following: lane 1, no RNA (negative control); lane 2, *A. fumigatus* isolate Af-237y (negative control); lane 3, purified AfuPV-1 (positive control); lane 4, *A. fumigatus* isolate Af-237y mycelia transfected with AfuPV-1 (positive control for transfection); lane 5, *A. fumigatus* isolate Af-237y mycelia transfected with AfuPV-1 dsRNA. (B) Analysis of in vitro translation products of AfuTmV-1 dsRNAs. In vitro translation products from unfractionated dsRNA were separated on a NuPAGE Novex 4–12% Bis-Tris protein gel (Invitrogen) and autoradiographed. The results shown represent samples taken after 30-, 60-, and 90-min incubation. A negative control (no RNA) incubated for 90 min facilitates identification of the major translation products—indicated by arrows and with their expected molecular weight to the *Right* of the gel—in the reactions that contain denatured dsRNA. The positions of marker proteins are indicated to the *Left* of the gel.





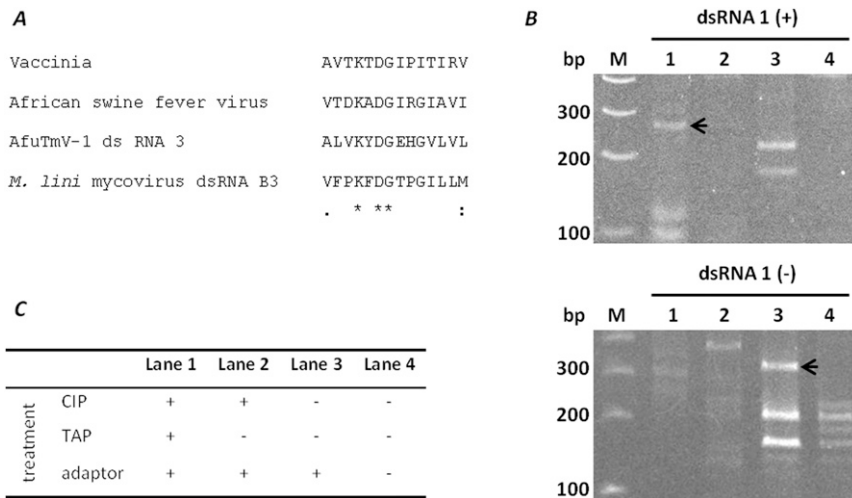

**Fig. S5.** AfuTmV-1 dsRNA 3 encodes for a putative methyltransferase. (A) Amino acid sequence alignment of regions on proteins putatively encoded by AfuTmV-1 dsRNA 3, *Melampsora lini* dsRNA B3 (accession no. X64371), and vaccinia virus and African swine fever virus involved in 5'-capping of RNA. The principal lysine residue (K) is shown as part of a characteristic catalytic motif for viral GTPs. Asterisks signify identical amino acid residues, and colons signify highly conserved residues and single dots signify less conserved but related residues. (B and C) 5'-RLM RACE oligo-cap analysis of AfuTmV-1 dsRNA 1. Viral dsRNA was (i) treated with CIP and TAP and ligated to an oligoribonucleotide adaptor at the 5' terminus, (ii) treated with CIP only and ligated, (iii) left untreated and ligated dsRNA, and (iv) left untreated and unligated. Subsequently, RT-PCR was performed with a primer homologous to the oligonucleotide adaptor and a sequence-specific primer, and the products were electrophoresed on a 4.5% (wt/vol) native polyacrylamide gel. Expected product sizes are 277 bp for the dsRNA 1 positive strand and 311 bp for the negative strand, and are indicated by arrows. The positive reaction in lane 1 for the positive strand indicates that it is capped, whereas the positive reaction in lane 3 for the negative strand indicates that it is phosphorylated but not capped.

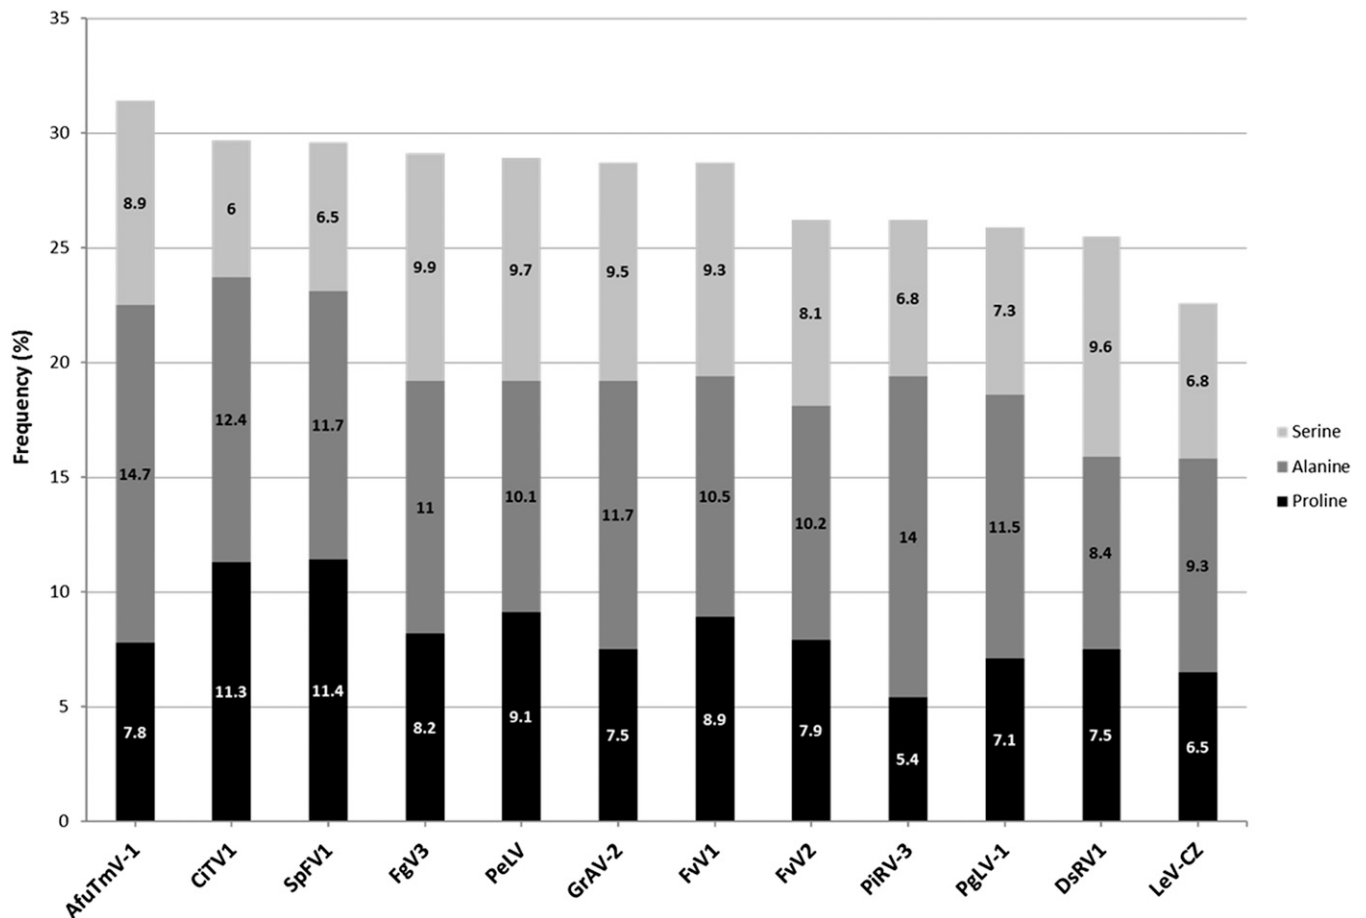

**Fig. S6.** Proline (P), alanine (A), and serine (S) ratios of PAS-rich proteins (PASrps) of AfuTmV-1 dsRNA4 and related unclassified viruses. Virus names, acronyms, and GenBank accession numbers are listed in Table S2. Amino acid lengths of complete ORFs and proline-alanine-serine (P-A-S) percent ratios of selected, unclassified insect, plant, and fungal viruses are summarized in Table S3.

**Table S1. Properties of AfuTmV-1 dsRNAs**

| Segment            | Accession no. | ORF size (aa, kDa) | Putative function     | UTR length, nt |        |
|--------------------|---------------|--------------------|-----------------------|----------------|--------|
|                    |               |                    |                       | 5'-UTR         | 3'-UTR |
| dsRNA 1 (2,403 bp) | HG975302      | 2,292 (763, 84.2)  | RdRP                  | 35             | 76     |
| dsRNA 2 (2,233 bp) | HG975303      | 2,091 (696, 75.8)  | Unknown*              | 70             | 72     |
| dsRNA 3 (1,970 bp) | HG975304      | 1,845 (614, 66.7)  | Methyltransferase     | 51             | 74     |
| dsRNA 4 (1,131 bp) | HG975305      | 840 (279, 29.1)    | PAS-rich protein (rp) | 86             | 205    |

\*Similar to proteins of unknown function encoded by respectively dsRNA isolated from *Alternaria* sp. FA0703 (ACL80752) and mycovirus dsRNA, B2, isolated from the flax rust, *Melampsora lini* (RZ1B2PEP).

PNAS PNAS PNAS PNAS PNAS

**Table S2. Viruses selected for phylogenetic analysis of RdRP and PASrp**

| Virus                                   | Abbreviation | GenBank accession no. |                | Ref.        |
|-----------------------------------------|--------------|-----------------------|----------------|-------------|
|                                         |              | RdRP                  | PASrp          |             |
| Duck astrovirus C-NGB                   | DAstV-1      | YP_002728002          |                | 1           |
| Turkey astrovirus 1                     | TAstV-1      | CAB95006              |                | 2           |
| Wood pigeon astrovirus                  | WAstV        | CBY02491.1            |                | Unpublished |
| Human astrovirus 1                      | HAstV        | NP_751905             |                | 3           |
| Potato virus Y                          | PVY          | EU563512              |                | 4           |
| Tobacco etch virus                      | TeV          | AEU12509.1            |                | Unpublished |
| Sunflower chlorotic mottle virus        | SuCMoV       | YP_003580192.1        |                | 5           |
| Pepper cryptic virus 1                  | PCV1         | AEJ07890              |                | 6           |
| Chlorella vulgaris partitivirus 2       | CvPV         | JX392808              |                | Unpublished |
| Pepper cryptic virus 2                  | PCV2         | AEJ07892              |                | 6           |
| Beet cryptic virus 3                    | BCV3         | AAB27624.1            |                | 7           |
| Rabbit vesivirus                        | RaV          | NC008580.1            |                | 8           |
| Walrus calicivirus                      | WCV          | NP_786919.1           |                | 9           |
| Feline calicivirus                      | FCV          | NP_783308             |                | 10          |
| Human rhinovirus A                      | HRV          | NP_740401.1           |                | Unpublished |
| Foot and mouth disease virus            | FMDV         | AHW45732              |                | 11          |
| Human hepatitis A virus                 | HAV          | GNNYHB                |                | 12          |
| Grapevine fan leaf virus                | GFLV         | BAA00761              |                | 13          |
| Cycas necrotic stunt virus              | CNSV         | NP_734017             |                | 14          |
| Radish mosaic virus                     | RaMV         | AAY32935.1            |                | 15          |
| Saccharomyces cerevisiae virus L-A      | ScL-A (L1)   | NP_620495             |                | 16          |
| Penicillium chrysogenum virus           | PcV          | YP_392482             |                | 17          |
| Persimmon latent virus                  | PeLV         |                       | BAN29037.1     | 18          |
| Circulifer tenellus virus 1             | CiTV1        |                       | YP_003800002.1 | 19          |
| Spissistilus festinus virus 1           | SpFV1        |                       | YP_003800000.1 | 19          |
| Phlebiopsis gigantea large virus-1      | PgLV-1       |                       | CAJ34331.3     | 20          |
| Fusarium graminearum virus 3            | FgV3         |                       | YP_003288788   | 21          |
| Diplodia scrobiculata RNA virus 1       | DsRV1        |                       | ACD91657       | 22          |
| Lentinula edodes virus-CZ               | LeV-CZ       |                       | AEB96149       | 23          |
| Fusarium virguliforme dsRNA mycovirus 1 | FvV1         |                       | AEZ54147.1     | 24          |
| Fusarium virguliforme dsRNA mycovirus 2 | FvV2         |                       | AEZ54148       | 24          |
| Grapevine-associated totivirus-2        | GrAV-2       |                       | ADO60932.1     | 25          |
| Phytophthora infestans RNA virus-3      | PiRV-3       |                       | AEX87901.1     | 26          |

- Fu Y, et al. (2009) Complete sequence of a duck astrovirus associated with fatal hepatitis in ducklings. *J Gen Virol* 90(Pt 5):1104–1108.
- Jonassen CM, Jonassen TO, Grinde B (1998) A common RNA motif in the 3' end of the genomes of astroviruses, avian infectious bronchitis virus and an equine rhinovirus. *J Gen Virol* 79(Pt 4):715–718.
- Geigenmüller U, Chew T, Ginzton N, Matsui SM (2002) Processing of nonstructural protein 1a of human astrovirus. *J Virol* 76(4):2003–2008.
- Dullemans AM, Cuperus C, Verbeek M, van der Vlugt RA (2011) Complete nucleotide sequence of a potato isolate of strain group C of *Potato virus Y* from 1938. *Arch Virol* 156(3):473–477.
- Bejerman N, Giolitti F, de Breuil S, Lenardon S (2010) Molecular characterization of *Sunflower chlorotic mottle virus*: A member of a distinct species in the genus *Potyvirus*. *Arch Virol* 155(8):1331–1335.
- Sabanadzovic S, Valverde RA (2011) Properties and detection of two cryptoviruses from pepper (*Capsicum annuum*). *Virus Genes* 43(2):307–312.
- Xie WS, Antoniw JF, White RF (1993) Nucleotide sequence of beet cryptic virus 3 dsRNA2 which encodes a putative RNA-dependent RNA polymerase. *J Gen Virol* 74(Pt 7):1467–1470.
- Martin-Alonso JM, et al. (2005) Isolation and characterization of a new *Vesivirus* from rabbits. *Virology* 337(2):373–383.
- Ganova-Raeva L, Smith AW, Fields H, Khudyakov Y (2004) New Calicivirus isolated from walrus. *Virus Res* 102(2):207–213.
- Sosnovtsev SV, Garfield M, Green KY (2002) Processing map and essential cleavage sites of the nonstructural polyprotein encoded by ORF1 of the feline calicivirus genome. *J Virol* 76(14):7060–7072.
- Nsamba P, et al. (2015) Determination of common genetic variants within the non-structural proteins of foot-and-mouth disease viruses isolated in sub-Saharan Africa. *Vet Microbiol* 177(1-2):106–122.
- Paul AV, et al. (1987) The entire nucleotide sequence of the genome of human hepatitis A virus (isolate MBB). *Virus Res* 8(2):153–171.
- Ritzenthaler C, et al. (1991) Complete nucleotide sequence and genetic organization of grapevine fanleaf nepovirus RNA1. *J Gen Virol* 72(Pt 10):2357–2365.
- Han SS, Karasev AV, Ieki H, Iwanami T (2002) Nucleotide sequence and taxonomy of *Cycas necrotic stunt virus*. Brief report. *Arch Virol* 147(11):2207–2214.
- Petrzik K, Holá M, Spak J (2005) Complete nucleotide sequence of Radish mosaic virus RNA polymerase gene and phylogenetic relationships in the genus *Comovirus*. *Acta Virol* 49(4):271–275.
- Icho T, Wickner RB (1989) The double-stranded RNA genome of yeast virus L-A encodes its own putative RNA polymerase by fusing two open reading frames. *J Biol Chem* 264(12):6716–6723.
- Castón JR, et al. (2003) Three-dimensional structure of penicillium chrysogenum virus: A double-stranded RNA virus with a genuine T=1 capsid. *J Mol Biol* 331(2):417–431.
- Ito T, Suzuki K, Nakano M (2013) Genetic characterization of novel putative rhabdovirus and dsRNA virus from Japanese persimmon. *J Gen Virol* 94(Pt 8):1917–1921.
- Spear A, Sisterson MS, Yokomi R, Stenger DC (2010) Plant-feeding insects harbor double-stranded RNA viruses encoding a novel proline-alanine rich protein and a polymerase distantly related to that of fungal viruses. *Virology* 404(2):304–311.
- Kozlakidis Z, et al. (2009) Molecular characterisation of two novel double-stranded RNA elements from *Phlebiopsis gigantea*. *Virus Genes* 39(1):132–136.
- Yu J, Kwon SJ, Lee KM, Son M, Kim KH (2009) Complete nucleotide sequence of double-stranded RNA viruses from *Fusarium graminearum* strain DK3. *Arch Virol* 154(11):1855–1858.
- De Wet J, Bihon W, Preisig O, Wingfield BD, Wingfield MJ (2011) Characterization of a novel dsRNA element in the pine endophytic fungus *Diplodia scrobiculata*. *Arch Virol* 156(7):1199–1208.
- Magae Y (2012) Molecular characterization of a novel mycovirus in the cultivated mushroom, *Lentinula edodes*. *Virus J* 9:60.
- Marvelli RA, et al. (2014) Identification of novel double-stranded RNA mycoviruses of *Fusarium virguliforme* and evidence of their effects on virulence. *Arch Virol* 159(2):349–352.
- Al Rwahnih M, Daubert S, Urbez-Torres JR, Cordero F, Rowhani A (2011) Deep sequencing evidence from single grapevine plants reveals a virome dominated by mycoviruses. *Arch Virol* 156(3):397–403.
- Cai G, Krychiv JF, Myers K, Fry WE, Hillman BI (2013) A new virus from the plant pathogenic oomycete *Phytophthora infestans* with an 8 kb dsRNA genome: The sixth member of a proposed new virus genus. *Virology* 435(2):341–349.

**Table S3. Amino acid lengths of complete ORFs and proline–alanine–serine (P–A–S) percent ratios of selected unclassified insect, plant, and fungal viruses**

| Virus                                          | Abbreviation | Proline–alanine–serine-rich protein (PARp) |             |            |             |             | Length, aa |
|------------------------------------------------|--------------|--------------------------------------------|-------------|------------|-------------|-------------|------------|
|                                                |              | Proline                                    | Alanine     | Serine     | P–A         | P–A–S       |            |
| <i>Aspergillus fumigatus</i> tetramycovirus-1  | AfuTmV-1     | 24 (8.6%)                                  | 40 (14.3%)  | 25 (8.9%)  | 64 (22.9%)  | 89 (31.9%)  | 279        |
| <i>Circulifer tenellus</i> virus 1             | CiTV1        | 128 (11.3%)                                | 141 (12.4%) | 68 (6.0%)  | 269 (23.7%) | 337 (29.7%) | 1,133      |
| <i>Spissistilus festinus</i> virus 1           | SpFV1        | 125 (11.4%)                                | 129 (11.7%) | 72 (6.5%)  | 254 (23.1%) | 326 (29.6%) | 1,101      |
| <i>Fusarium graminearum</i> virus 3            | FgV3         | 115 (8.2%)                                 | 151 (11.0%) | 135 (9.9%) | 266 (19.4%) | 401 (29.3%) | 1,369      |
| Persimmon latent virus                         | PeLV         | 98 (9.1%)                                  | 109 (10.1%) | 104 (9.7%) | 207 (19.3%) | 311 (28.9%) | 1,075      |
| Grapevine-associated totivirus-2               | GrAV-2       | 99 (7.5%)                                  | 154 (11.7%) | 125 (9.5%) | 253 (19.3%) | 378 (28.8%) | 1,313      |
| <i>Fusarium virguliforme</i> dsRNA mycovirus 1 | FvV1         | 117 (8.9%)                                 | 137 (10.5%) | 122 (9.3%) | 254 (19.4%) | 376 (28.7%) | 1,311      |
| <i>Fusarium virguliforme</i> dsRNA mycovirus 2 | FvV2         | 107 (7.9%)                                 | 138 (10.2%) | 109 (8.1%) | 245 (18.2%) | 354 (26.3%) | 1,347      |
| <i>Phytophthora infestans</i> RNA virus-3      | PiRV-3       | 70 (5.4%)                                  | 182 (14%)   | 88 (6.8%)  | 252 (19.4%) | 340 (26.2%) | 1,296      |
| <i>Phlebiopsis gigantea</i> large virus-1      | PgLV-1       | 142 (7.1%)                                 | 232 (11.5%) | 147 (7.3%) | 374 (18.6%) | 521 (25.9%) | 2,012      |
| <i>Diplodia scrobiculata</i> RNA virus 1       | DsRV1        | 31 (7.5%)                                  | 35 (8.4%)   | 40 (9.6%)  | 66 (15.9%)  | 106 (25.5%) | 416        |
| <i>Lentinula edodes</i> virus-CZ               | LeV-CZ       | 129 (6.5%)                                 | 184 (9.3%)  | 135 (6.8%) | 313 (15.8%) | 448 (22.7%) | 1,975      |
